# Supplementary material for: Alkylthienyl substituted asymmetric 2D BDT and DTBT-based polymer solar cells with a power conversion efficiency of 9.2%
Source: Royal Society of Chemistry journal article supplement (doi:10.1039/c7ta10247j), 2018-01-01
Supplement: c7ta10247j1.pdf [file c7ta10247j1.pdf]

## Electronic Supplementary Information

### **Alkylthienyl substituted asymmetric 2D BDT and DTBT-based polymer solar cells with a power conversion efficiency of 9.2%**

Chuantao Gu<sup>‡a</sup>, Deyu Liu<sup>‡b,d</sup>, Junyi Wang<sup>b</sup>, Qingfen Niu<sup>c\*</sup>, Chunyang Gu<sup>b</sup>, Bilal Shahid<sup>b,d</sup>, Bing Yu<sup>a</sup>, Hailin Cong<sup>a\*</sup>, and Renqiang Yang<sup>b\*</sup>

<sup>a</sup> *Institute of Biomedical Materials and Engineering, College of Materials Science and Engineering, Qingdao University, Qingdao 266071, China, E-mail: hailincong@yahoo.com*

<sup>b</sup> *CAS Key Laboratory of Bio-based Materials, Qingdao Institute of Bioenergy and Bioprocess Technology, Chinese Academy of Sciences, Qingdao 266101, China, E-mail: yangrq@qibebt.ac.cn*

<sup>c</sup> *Shandong Provincial Key Laboratory of Fine Chemicals, School of Chemistry and Pharmaceutical Engineering, Qilu University of Technology, Jinan 250353, China, E-mail: qf\_niu1216@qlu.edu.cn*

<sup>d</sup> *University of Chinese Academy of Sciences, Beijing 100049, China*

<sup>‡</sup> Chuantao Gu and Deyu Liu contributed equally to this work.

## 1. Synthesis

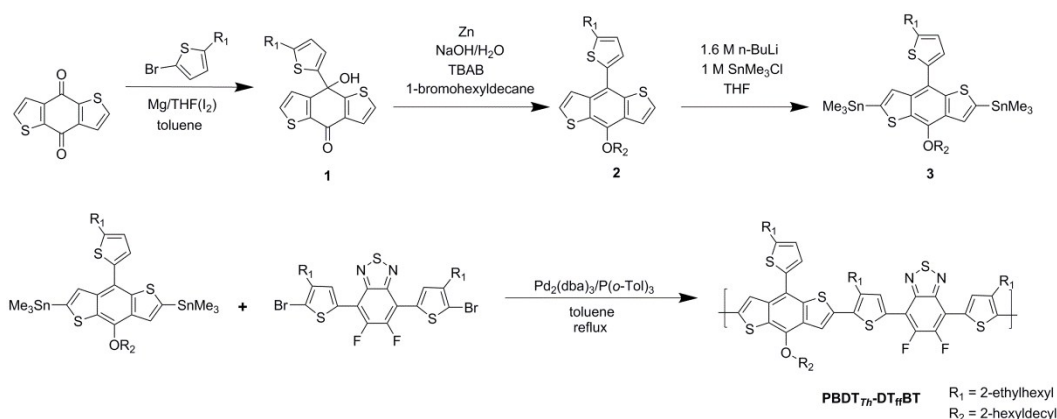

Fig. S1 Synthetic routes of monomer and polymer.

### 8-hydroxy-8-(5-(2-ethylhexyl)thiophen-2-yl)benzo[1,2-*b*:4,5-*b'*]dithiophen-4-one (1)

To a mixture of magnesium turnings (0.86 g, 36 mmol) and a grain of  $I_2$  in dry THF (10 mL) was added dropwise 2-bromo-5-(2-ethylhexyl)thiophene (8.26 g, 30 mmol) in THF (20 mL) at a rate sufficient to maintain reflux under nitrogen. After addition, the reflux was maintained for 3 h. The Grignard reagent was then added dropwise to a solution of 4,8-dihydrobenzo[1,2-*b*:4,5-*b'*]dithiophen-4,8-dione (4.40 g, 20 mmol) in toluene (400 mL) in an ice-water bath. Finally, the mixture was stirred for 30 h at room temperature under nitrogen. Then, the mixture was hydrolyzed by careful addition of water followed by 38% aqueous HCl and extracted with diethyl ether. The organic phase was dried over  $Na_2SO_4$ . After removing the solvent under vacuum, residue (5.41 g, 65%) was used for next step without further purification.

### 4-hexyldecyloxy-8-(5-(2-ethylhexyl)thiophen-2-yl)benzo[1,2-*b*:4,5-*b'*]dithiophene (2)

Compound **1** (4.17 g, 10.0 mmol) and zinc powder (1.62 g, 25.0 mmol) were put into a 100 mL flask under nitrogen; then 5.33 g of NaOH in water (50 mL) was added into the mixture. The mixture was well stirred and heated to reflux for 3 h. Then, 1-bromo-2-hexyl-decane (7.63 g, 25.0 mmol) and a catalytic amount of tetrabutylammonium bromide were added into the flask. After being refluxed overnight, the reactant was poured into cold water and extracted by petroleum ether. The organic phase was dried over  $Na_2SO_4$ . After removing the solvent under vacuum, residue was purified by silica column chromatography with petroleum ether to give compound **2** as pale yellow oil (3.63 g, 58%).  $^1H$  NMR (600 MHz,  $CDCl_3$ ):  $\delta$  (ppm) 7.58 (d,  $J = 5.6$  Hz, 1H), 7.52 (d,  $J = 5.6$  Hz, 1H), 7.40 (d,  $J = 5.6$  Hz, 1H), 7.37 (d,  $J = 5.7$  Hz, 1H), 7.21 (d,  $J = 3.5$  Hz, 1H), 6.85

(d,  $J = 3.4$  Hz, 1H), 4.25 (d,  $J = 5.4$  Hz, 2H), 2.83 (d,  $J = 6.8$  Hz, 2H), 1.91 - 1.85 (m, 1H), 1.68 - 1.61 (m, 3H), 1.51 - 1.27 (m, 30H), 0.95 - 0.87 (m, 12H).  $^{13}\text{C}$  NMR (151 MHz,  $\text{CDCl}_3$ ):  $\delta$  (ppm) 148.45, 145.24, 140.48, 138.53, 137.44, 129.99, 128.78, 127.26, 126.94, 126.33, 125.32, 123.60, 120.11, 119.90, 76.44, 41.50, 39.32, 34.29, 32.53, 31.97, 31.95, 31.36, 31.34, 30.12, 29.79, 29.68, 29.41, 28.97, 27.03, 27.00, 26.97, 25.77, 23.07, 22.75, 14.19, 14.18, 10.95.

**2,6-bis(trimethyltin)-4-hexyldecyloxy-8-(5-(2-ethylhexyl)thiophen-2-yl)benzo[1,2-*b*:4,5-*b'*]dithiophene (3)**

To a solution of compound **2** (3.13 g, 5.0 mmol) in THF (60 mL) at  $-78$  °C was added dropwise *n*-BuLi (7.81 mL, 12.5 mmol, 1.6 M in hexane) under nitrogen. The mixture was stirred at  $-78$  °C for 1 h and then warmed to room temperature for 0.5 h. After cooling back to  $-78$  °C again, trimethyltin chloride (13.5 mL, 13.5 mmol, 1 M in hexane) was added in one portion. The mixture was brought to room temperature and stirred overnight. Water was subsequently added to the reaction mixture and extracted by diethyl ether. The combined organic extracts were dried over  $\text{Na}_2\text{SO}_4$  and the solvent was removed under reduced pressure. The residue was recrystallized by ethanol two times. Compound **3** was obtained as a white solid (2.61 g, 55%).  $^1\text{H}$  NMR (600 MHz,  $\text{CDCl}_3$ ):  $\delta$  (ppm) 7.63 (s, 1H), 7.57 (s, 1H), 7.23 (d,  $J = 3.4$  Hz, 1H), 6.87 (d,  $J = 3.4$  Hz, 1H), 4.27 (d,  $J = 5.3$  Hz, 2H), 2.90 - 2.81 (m, 2H), 1.92 - 1.86 (m, 1H), 1.70 - 1.64 (m, 3H), 1.51 - 1.28 (m, 30H), 0.97 - 0.87 (m, 12H), 0.42 (s, 18H).  $^{13}\text{C}$  NMR (151 MHz,  $\text{CDCl}_3$ ):  $\delta$  (ppm) 147.01, 144.89, 144.81, 141.60, 140.88, 139.68, 138.21, 132.67, 131.21, 131.06, 127.88, 127.05, 125.21, 118.23, 75.97, 41.49, 39.28, 32.53, 31.98, 31.97, 31.43, 30.20, 29.84, 29.74, 29.43, 28.97, 27.23, 25.82, 23.06, 22.75, 22.72, 14.19, 14.17, 14.15, 10.98, -8.33, -8.37.

**Synthesis of PBDT<sub>TH</sub>-DT<sub>TH</sub>BT**

To a 25 mL flask, compound **3** (142.6 mg, 0.15 mmol), 4,7-bis(5-bromo-4-(2-ethylhexyl) -2-thienyl)-2,1,3-benzothiadiazole (102.4 mg, 0.15 mmol),  $\text{Pd}_2(\text{dba})_3$  (4.2 mg, 0.0045 mmol), and tri(*o*-tolyl)phosphine (8.4 mg, 0.027 mmol) were added under nitrogen. After the addition of toluene (5 mL), the mixture was heated to  $110$  °C and maintained at the same temperature for 12 h. After cooling to room temperature, the mixture was poured into methanol. The precipitate was collected and purified by column chromatography over silica using chloroform as the eluent. After removing the solvent, the resulting solid was dissolved into a small amount of chloroform and

then poured into methanol again. The product was collected and dried overnight under vacuum at 40 °C with the yield 63% for PBDT<sub>Th</sub>-DT<sub>ff</sub>BT as a blue-black solid.

## 2. TGA

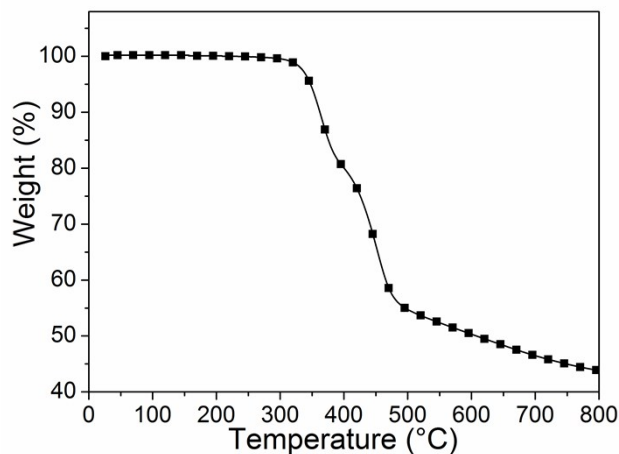

**Fig. S2** TGA curve of PBDT<sub>Th</sub>-DT<sub>ff</sub>BT with a heating rate of 10 °C min<sup>-1</sup> under nitrogen atmosphere.

## 3. Detailed device parameters of PSCs

**Table S1.** PSCs performance with device configuration ITO/PEDOT:PSS/ PBDT<sub>Th</sub>-DT<sub>ff</sub>BT:PC<sub>71</sub>BM/PFN-Br/Al

| Active layer                                                 | ratio | spin-coating speed (rpm) | annealing temp. (°C) | DIO (%) | V <sub>OC</sub> (V) | J <sub>SC</sub> (mA cm <sup>-2</sup> ) | FF (%) | PCE (%) |
|--------------------------------------------------------------|-------|--------------------------|----------------------|---------|---------------------|----------------------------------------|--------|---------|
| PBDT <sub>Th</sub> -DT <sub>ff</sub> BT :PC <sub>71</sub> BM | 1:1.5 | 1500                     | NO                   | 0       | 0.91                | 10.02                                  | 65.5   | 5.97    |
|                                                              | 1:1.5 | 1600                     | NO                   | 0       | 0.92                | 11.09                                  | 68.5   | 6.99    |
|                                                              | 1:1.5 | 1700                     | NO                   | 0       | 0.91                | 10.62                                  | 70.6   | 6.82    |
|                                                              | 1:2.5 | 1600                     | NO                   | 0       | 0.90                | 10.97                                  | 64.7   | 6.39    |
|                                                              | 1:2   | 1600                     | NO                   | 0       | 0.91                | 11.92                                  | 65.8   | 7.14    |
|                                                              | 1:2   | 1600                     | NO                   | 0.5     | 0.83                | 12.77                                  | 66.6   | 7.06    |
|                                                              | 1:2   | 1600                     | NO                   | 1.0     | 0.84                | 14.65                                  | 62.1   | 7.64    |
|                                                              | 1:2   | 1600                     | NO                   | 1.5     | 0.83                | 14.67                                  | 56.6   | 6.89    |
|                                                              | 1:2   | 1000                     | 100                  | 1.0     | 0.85                | 13.61                                  | 65.7   | 7.60    |
|                                                              | 1:2   | 1200                     | 100                  | 1.0     | 0.85                | 13.07                                  | 70.1   | 7.79    |
|                                                              | 1:2   | 1400                     | 100                  | 1.0     | 0.87                | 14.12                                  | 70.6   | 8.67    |
|                                                              | 1:2   | 1600                     | 100                  | 1.0     | 0.87                | 15.06                                  | 70.4   | 9.22    |
|                                                              | 1:2   | 1800                     | 100                  | 1.0     | 0.87                | 14.57                                  | 69.5   | 8.81    |
|                                                              | 1:2   | 2000                     | 100                  | 1.0     | 0.87                | 13.55                                  | 72.1   | 8.48    |

**Table S2.** PSCs performance with device configuration ITO/PEDOT:PSS/ PBDT<sub>Th</sub>-DT<sub>ff</sub>BT:ITIC/PFN-Br/Al

| Active layer                                  | ratio | spin-coating speed (rpm) | annealing temp. (°C) | DIO (%) | V <sub>OC</sub> (V) | J <sub>SC</sub> (mA cm <sup>-2</sup> ) | FF (%) | PCE (%) |
|-----------------------------------------------|-------|--------------------------|----------------------|---------|---------------------|----------------------------------------|--------|---------|
| PBDT <sub>Th</sub> -DT <sub>ff</sub> BT :ITIC | 1:0.8 | 1800                     | NO                   | 0       | 0.91                | 12.78                                  | 50     | 5.81    |
|                                               | 1:1   | 1800                     | NO                   | 0       | 0.92                | 12.81                                  | 57.7   | 6.80    |
|                                               | 1:1.2 | 1800                     | NO                   | 0       | 0.91                | 12.77                                  | 59.3   | 6.89    |
|                                               | 1:1   | 1800                     | 100                  | 0       | 0.91                | 13.46                                  | 56.0   | 6.86    |
|                                               | 1:1   | 1600                     | 130                  | 0       | 0.90                | 12.88                                  | 61.1   | 7.08    |
|                                               | 1:1   | 1800                     | 130                  | 0       | 0.91                | 13.62                                  | 63.2   | 7.83    |
|                                               | 1:1   | 2000                     | 130                  | 0       | 0.91                | 12.96                                  | 62.3   | 7.35    |
|                                               | 1:1   | 1800                     | 150                  | 0       | 0.91                | 13.01                                  | 62.0   | 7.34    |
|                                               | 1:1   | 1800                     | 130                  | 1.0     | 0.93                | 11.60                                  | 53.7   | 5.79    |
|                                               | 1:1   | 1800                     | 130                  | 0.5     | 0.92                | 12.78                                  | 51.9   | 6.10    |
|                                               | 1:1   | 1800                     | 130                  | 1.5     | 0.91                | 13.60                                  | 54.5   | 6.74    |

#### 4. Hole mobility

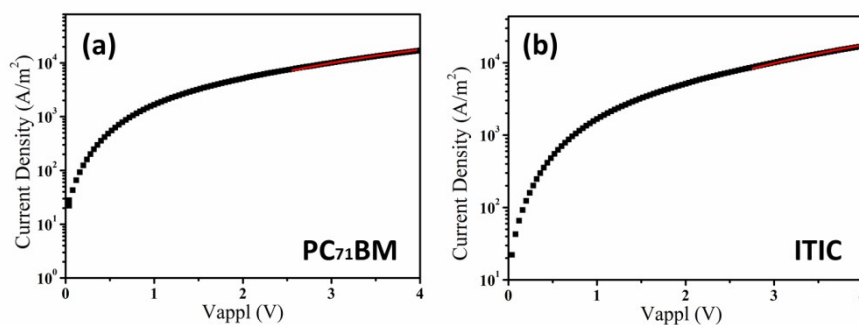

**Fig. S3.** Current density–voltage ( $J$ - $V$ ) curves for polymer:PC<sub>71</sub>BM (a) and polymer:ITIC (b) based device (the symbols are experimental data for transport of hole, and the red line is fitted according to the space-charge-limited-current model). The devices were constructed as ITO/PEDOT:PSS/polymer:PC<sub>71</sub>BM (or ITIC) (100 nm)/PFN-Br (10 nm)/Al (100 nm).

### 5. $J$ - $V$ curves of the optimal device based on $\text{PBDT}_{T_h}\text{-DT}_{ff}\text{BT/ITIC}$ under ILP

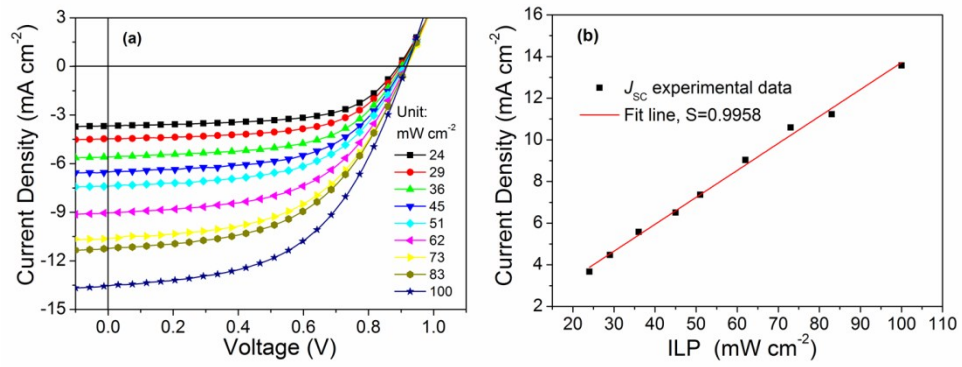

**Fig. S4.** (a)  $J$ - $V$  curves of the optimal device based on  $\text{PBDT}_{T_h}\text{-DT}_{ff}\text{BT/PC}_{71}\text{BM}$  under ILP, and (b)  $J_{sc}$  versus ILP curves.
